# Supplementary material for: Using financial incentives to increase initial uptake and completion of HPV vaccinations: protocol for a randomised controlled trial
Source: PubMed Central journal article supplement (PMC3471042; doi:10.1186/1472-6963-12-301), 2012-09-04
Supplement: 1472-6963-12-301-S1.pdf [file 1472-6963-12-301-S1.pdf]

**Additonal material 1**

**Standard HPV vaccination Invitation Letter – Control Groups**

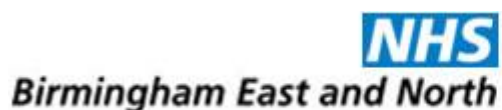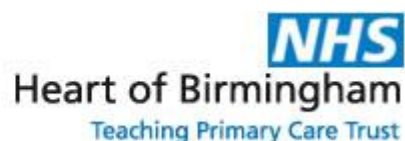

MISS XXXXX XXXXX  
ADDRESS LINE 1  
ADDRESS LINE 2  
ADDRESS LINE 3  
POSTCODE

Immunisation Team  
Newtown Health Centre  
171 Melbourne Avenue  
Newtown  
Birmingham  
B19 2JA

Date

Tel: 0345-245-0777

Dear XXXXXX,

We are stamping down on cancer and inviting you to attend your first Human Papilloma Virus (HPV) vaccination. A leaflet about the vaccination is included and you can call us on the local rate number 0345-245-0777 if you would like further information.

This is being offered to all girls 12 – 18 years of age and provides protection from cervical cancer.

The vaccination will be held at:

**Sutton Cottage Hospital  
27a Birmingham Road  
Sutton Coldfield  
West Midlands  
B72 1QH**

on **XX/XX/XXXX** at **XX:XX**.

If you need to arrange a different time or would prefer to attend a different clinic then please call the appointment line on the local rate number 0345-245-0777, Monday to Friday between 9am and 4pm.

Please do not contact the Health Centre directly to rearrange your appointment as they will not be able to help with this.

Yours sincerely

The Immunisation Team

Map

**(Photo of map included here)**

Modified HPV vaccination Invitation Letter – Intervention Groups

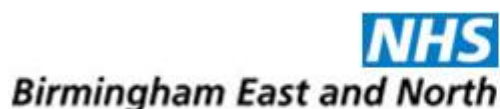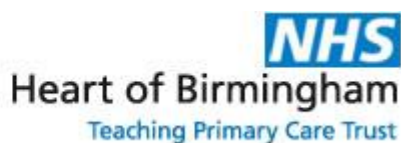

«PATIENT\_TITLE» «PATIENT\_FORENAME» Immunisation Team  
«PATIENT\_SURNAME» Safeguarding Offices  
«PATIENT\_PREMISES» Gee Business Centre  
«PATIENT\_ADDRESS\_STREET» Holborn Hill  
«PATIENT\_ADDRESS\_LOCALITY» Aston  
«PATIENT\_ADDRESS\_TOWN» Birmingham  
«PATIENT\_ADDRESS\_POST\_CODE» B7 5JE  
Date Tel: 0345-245-0777

Dear «Patient\_Title» «PATIENT\_SURNAME»,

We are writing to invite you to attend for your first Human Papilloma Virus (HPV) Vaccination.

This is being offered to all girls 12 – 18 years of age and provides protection from cervical cancer. You have been selected for a limited pilot incentive scheme where you will receive Love2Shop vouchers for receiving this vaccination. These can be redeemed at over 80 High Street stores. The vaccination is in 3 stages – you will receive £20 voucher for attending the 1<sup>st</sup> vaccination, £5 voucher for the 2<sup>nd</sup> and £20 for the 3<sup>rd</sup>.

Your appointment to receive the vaccination will be at:

**Partners In Health  
163 Yardley Green Road  
Bordesley Green  
Birmingham  
B9 5PU on «Current\_appointment\_date» at  
«Current\_appointment\_time».**

If you need to arrange a different time or would prefer to attend a different clinic then please call the appointment line on the local rate number 0345-245-0777, Monday to Friday between 9am and 4pm. Please note that in order to receive vouchers you must attend on the date specified above (or a revised mutually agreed date).

Please do not contact the Health Centre directly to rearrange your appointment as they will not be able to help with this.

A leaflet about the vaccination is included and you can call us on the local rate number 0345-245-0777 if you would like further information.

Yours sincerely

The Immunisation Team

Map

**(Photo of map included here)**
